# Supplementary material for: Berberine alleviates chronic pain-induced anxiety-like behaviors by inhibiting the activation of VLT-projecting cACC (Cg2) neurons
Source: PubMed Central journal article supplement — Commun Biol. 2024 Dec 19;7:1651. doi: 10.1038/s42003-024-07372-2 (PMC11659571; doi:10.1038/s42003-024-07372-2), 2024-12-19
Supplement: 42003_2024_7372_MOESM2_ESM.pdf [file 42003_2024_7372_MOESM2_ESM.pdf]

## Description Of Additional Supplementary File

**File name:** Supplementary Data 1

**Description:** The source data behind the graphs in the paper.
